# Supplementary material
Source: PubMed Central journal article supplement (PMC8579999)
Supplement: aem.01556-21-s0001.pdf [file aem.01556-21-s0001.pdf]

1 SUPPLEMENTAL MATERIAL

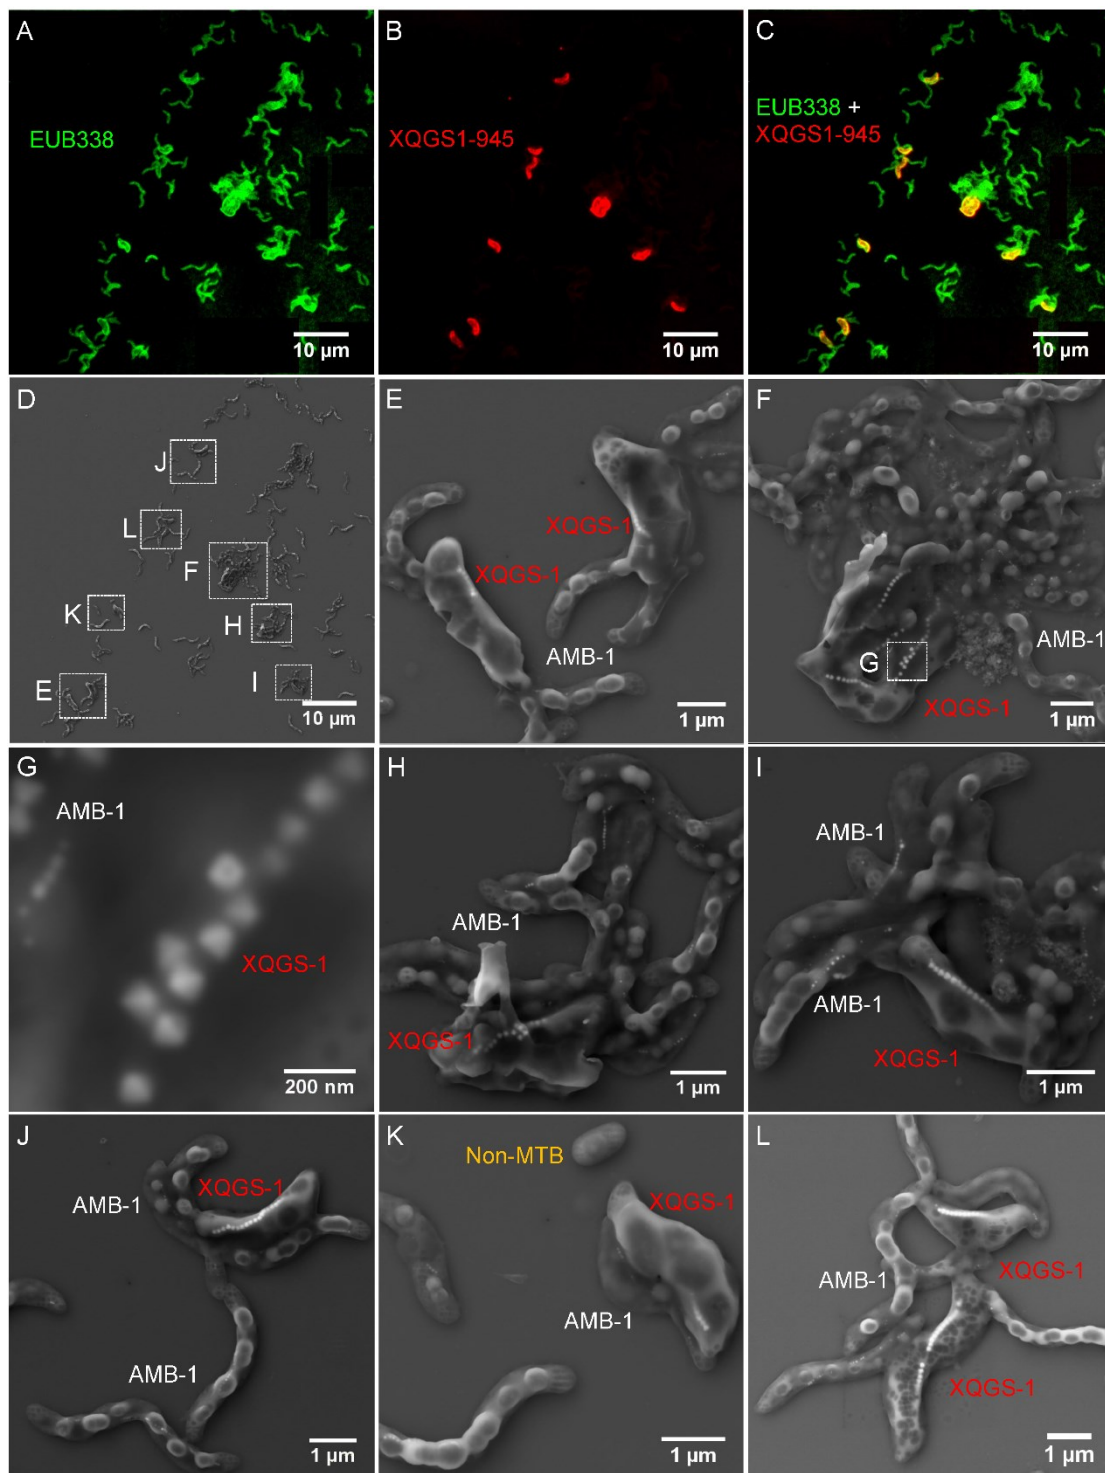

2

3 **FIG S1** Morphological identification of strain XQGS-1 cells with a coupled FISH-SEM  
4 approach. (A) Fluorescence micrograph of bacteria hybridized *in situ* with the 5'-FAM-  
5 labeled universal bacterial probe EUB338. (B) Fluorescence micrograph of bacteria  
6 hybridized *in situ* with the 5'-Cy3-labeled XQGS-1-specific probe XQGS1-945. (C)

7 Overlay of images (A) and (B). (D) Coordinated SEM image of the same field of view  
8 as in image (C). (E), (F), (H), (I), (J), (K), and (L) High-magnification SEM image of  
9 the boxed areas in (D). (G) Partial enlargement of the boxed area in (F).

10

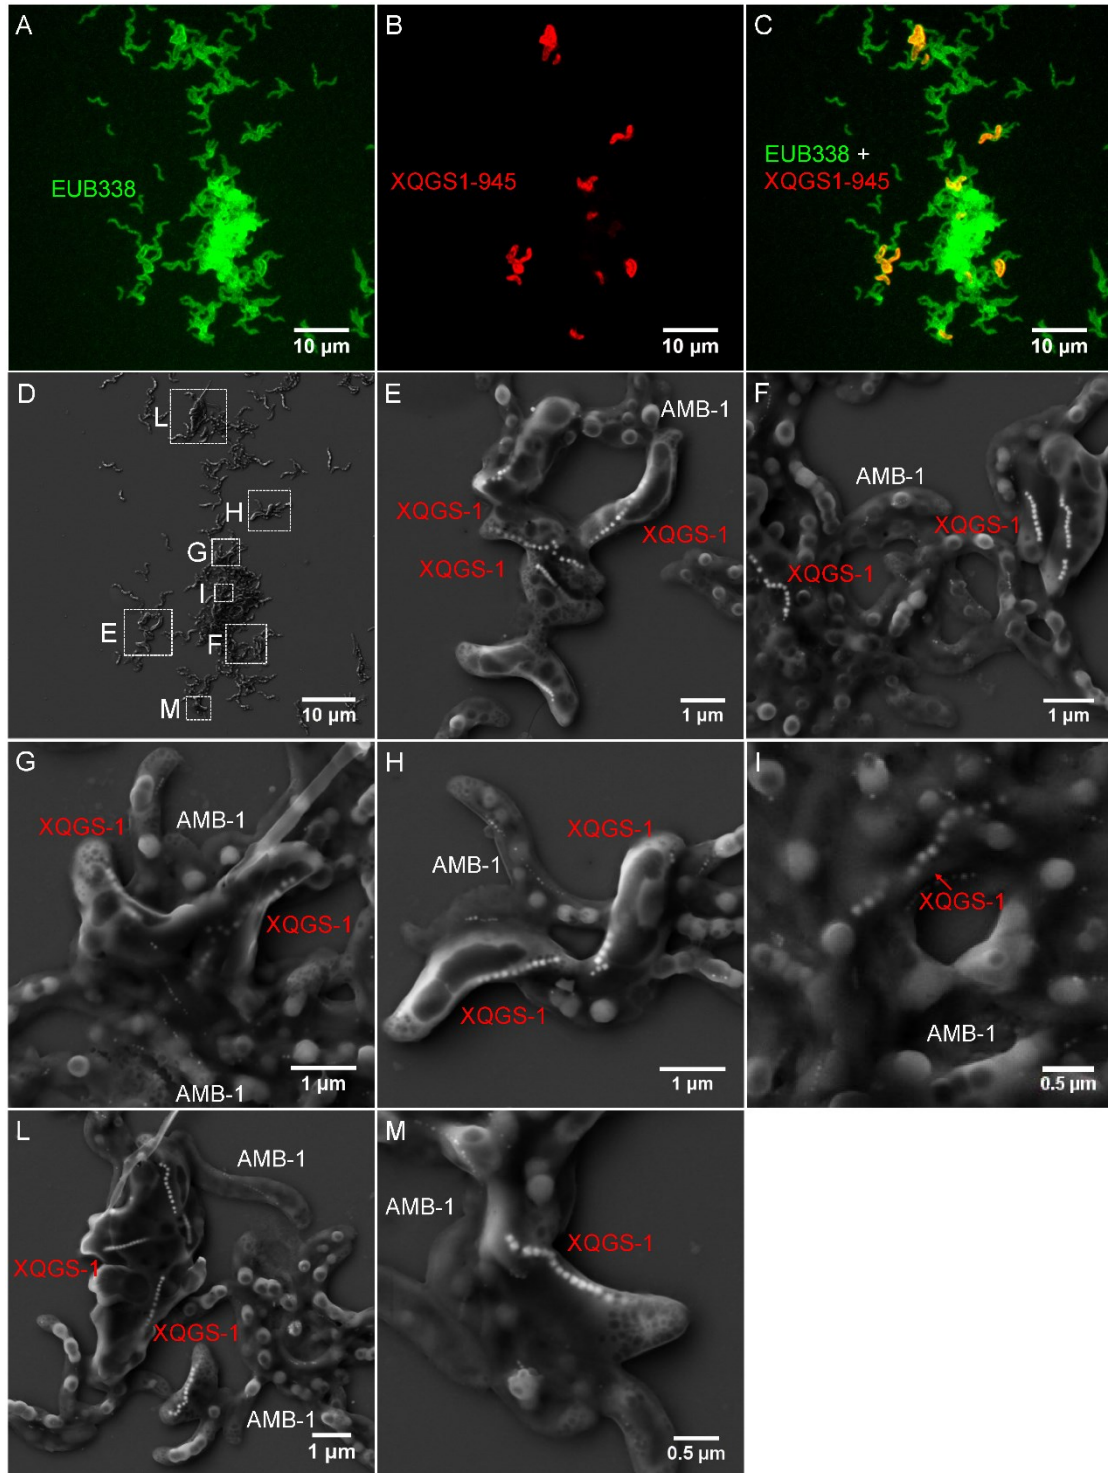

11

12 **FIG S2** Morphological identification of strain XQGS-1 cells with a coupled FISH-SEM

13 approach. (A) Fluorescence micrograph of bacteria hybridized *in situ* with the 5'-FAM-  
14 labeled universal bacterial probe EUB338. (B) Fluorescence micrograph of bacteria  
15 hybridized *in situ* with the 5'-Cy3-labeled XQGS-1-specific probe XQGS1-945. (C)  
16 Overlay of images (A) and (B). (D) Coordinated SEM image of the same field of view  
17 as in image (C). (E) - (M) High-magnification SEM image of the boxed areas in (C).  
18

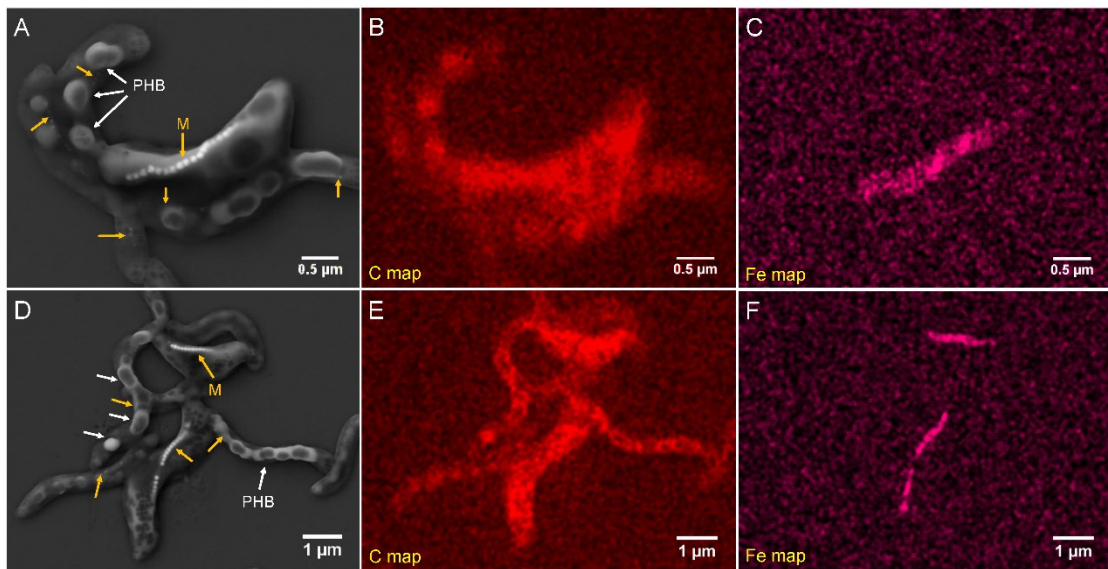

19  
20 **FIG S3** EDXS elemental mappings of strains AMB-1 cells with polyhydroxybutyrates  
21 (PHB) and magnetosome particles and XQGS-1 cells with magnetosome particles used  
22 for coupled FISH-SEM experiments. (A) and (D) SEM images according with FIG S1I  
23 and FIG 1G. (B) and (E) EDXS elemental maps of C (C K $\alpha$ ). (C) and (F) EDXS  
24 elemental maps of Fe (Fe K $\alpha$ ).  
25



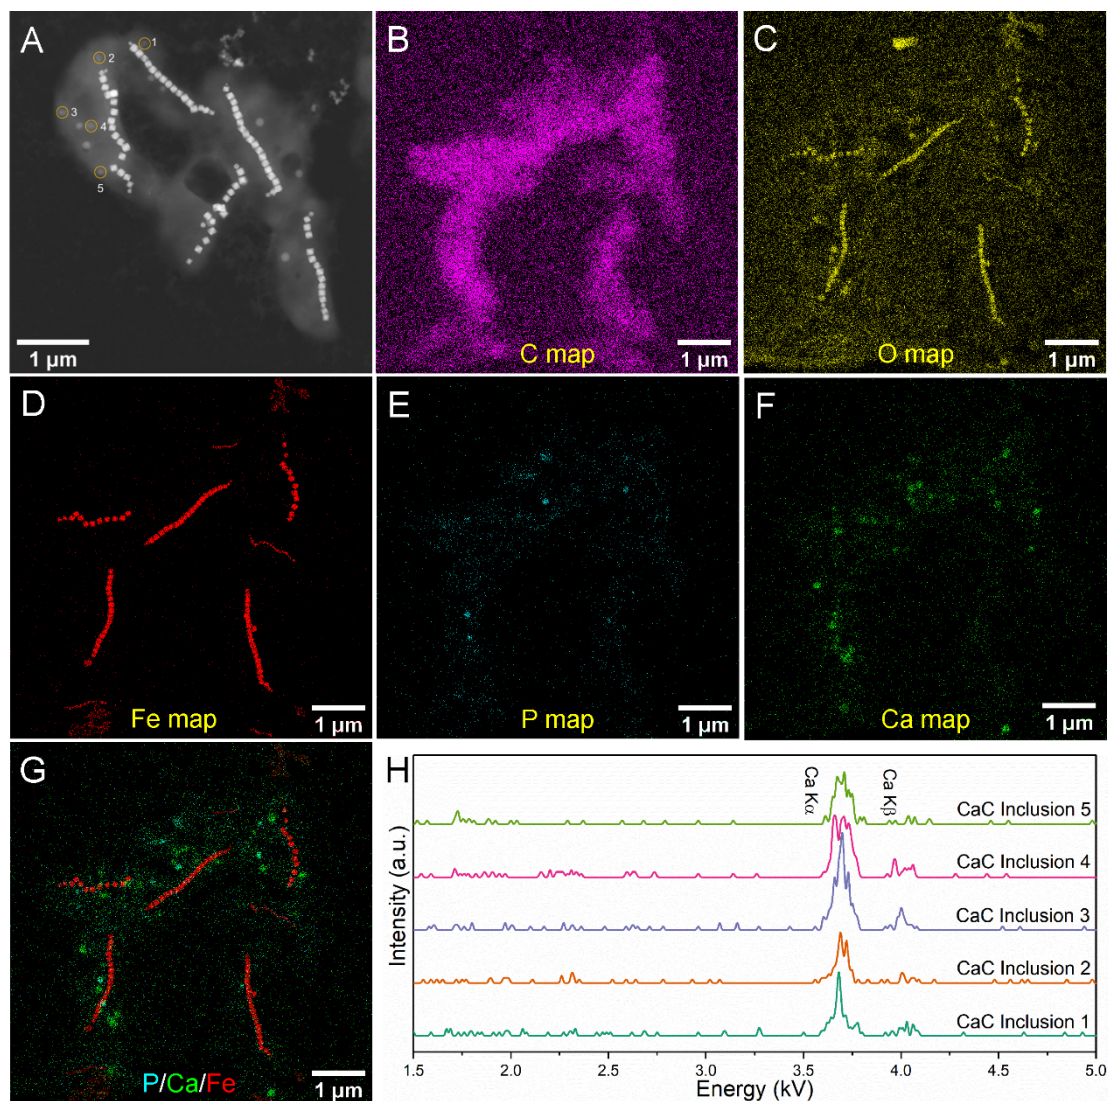

26

27 **FIG. S4** EDXS elemental mapping of five XQGS-1 cells in the STEM-HAADF mode.  
 28 (A) STEM-HAADF image with positions of five type-III (calcium carbonate granule)  
 29 inclusions (yellow hollow circles). (B) - (F) EDXS elemental maps of (B) C ( $C K\alpha$ ),  
 30 (C) O ( $O K\alpha$ ), (D) Fe ( $Fe K\alpha$ ), (E) P ( $P K\alpha$ ), and (F) Ca ( $Ca K\alpha$ ). (G) RGB map with P  
 31 (cyan), Ca (green), and Fe (red). (H) EDXS spectra for selected ( $\sim 50$  nm) regions of  
 32 five type-III (calcium carbonate granule) inclusions in (A).

33

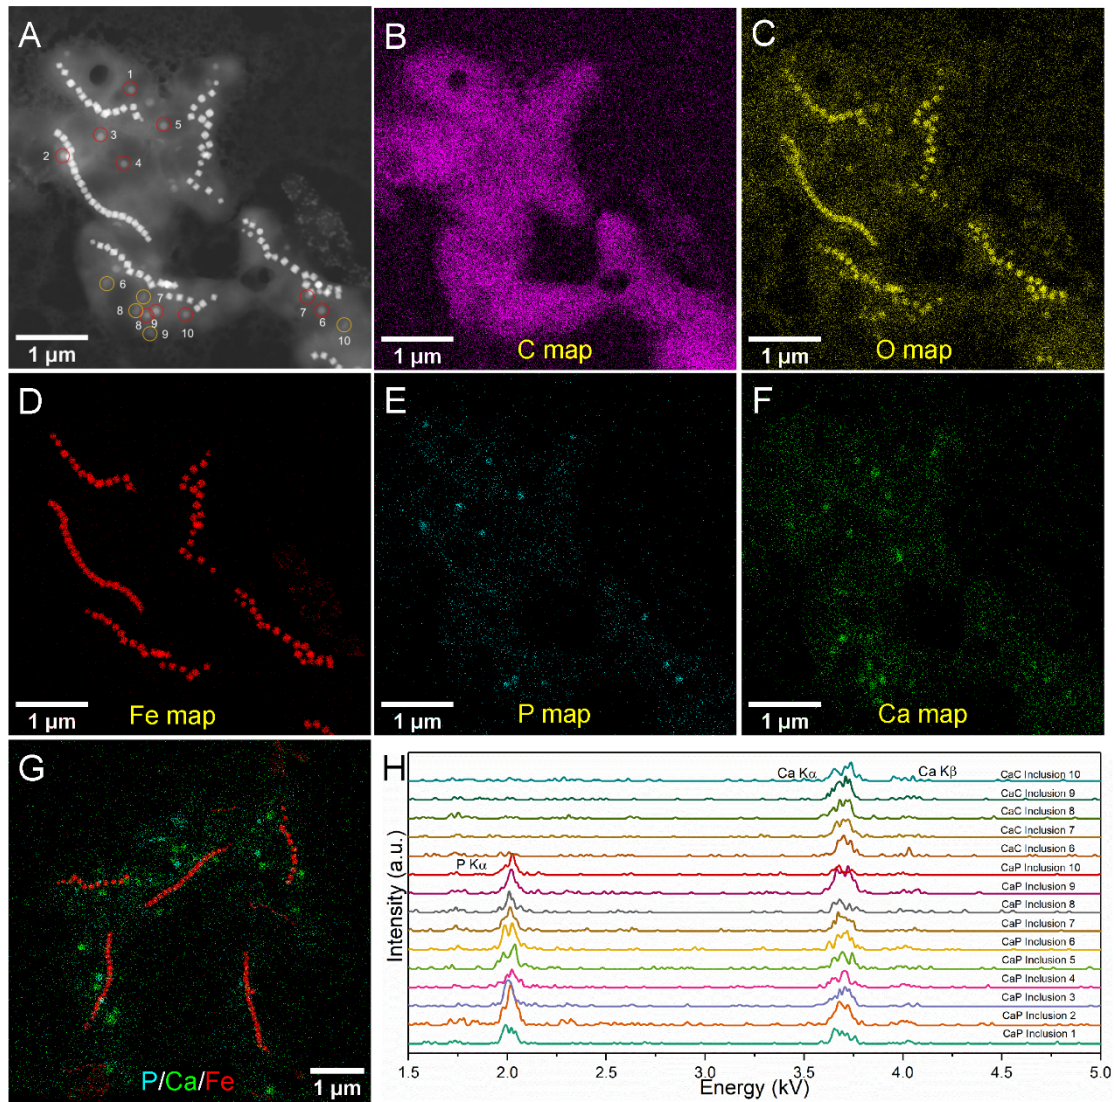

34

35 **FIG. S5** EDXS elemental mapping of five XQGS-1 cells in the STEM-HAADF mode.

36 (A) STEM-HAADF image with positions of ten type-II (calcium phosphate granule)

37 inclusions (red hollow circles) and five type-III (calcium carbonate granule)

38 inclusions (yellow hollow circles). (B) - (F) EDXS elemental maps of (B) C (C K $\alpha$ ), (C) O (O K $\alpha$ ),

39 (D) Fe (Fe K $\alpha$ ), (E) P (P K $\alpha$ ), and (F) Ca (Ca K $\alpha$ ). (G) RGB map with P (cyan), Ca

40 (green), and Fe (red). (H) EDXS spectra for selected (~50 nm) regions of ten type-II

41 (calcium phosphate granule) inclusions and five type-III (calcium carbonate granule)

42 inclusions in (A).

43

44 **SUPPLEMENTAL TABLE**

45 Table S1. 16S rRNA sequences retrieved from Xingqingong Lake

46

| Strain                      | No. of clones | Percentage of clones | Most similar strain                      | Accession | Identity | Reference   |
|-----------------------------|---------------|----------------------|------------------------------------------|-----------|----------|-------------|
| XQGS-1                      | 22            | 73.3%                | <i>Caenispirillum salinarum</i>          | NR_117049 | 92.6%    | (1)         |
| <i>Magnetospirillum</i> sp. | 6             | 20%                  | <i>Magnetospirillum</i> sp. clone WYH-24 | JX537774  | 99.8%    | (2)         |
| <i>Methylobacillus</i> sp.  | 2             | 6.7%                 | <i>Methylobacillus</i> sp. clone CH1-43  | JX079398  | 97.1%    | Unpublished |

47

48 **REFERENCES**

- 49 1. Ritika C, Suresh K, Kumar PA. 2012. *Caenispirillum salinarum* sp nov., a  
50 member of the family *Rhodospirillaceae* isolated from a solar saltern. Int J Syst  
51 Evol Microbiol 62:1698-1702.
- 52 2. Chen HT, Lin W, Wang YZ, Li JH, Chen GJ, Pan YX. 2013. Diversity and  
53 magnetism of magnetotactic bacteria in Lake Weiyang near Xi'an city. Quat Sci  
54 33:88-96.
